# Supplementary material for: A structural equation modeling approach for the association of a healthy eating index with metabolic syndrome and cardio-metabolic risk factors among obese individuals
Source: PubMed Central journal article supplement (PMC6602284; doi:10.1371/journal.pone.0219193), 2019-07-01

**Code:**

**date:**

**your name:**

**1. How hungry do you feel?**

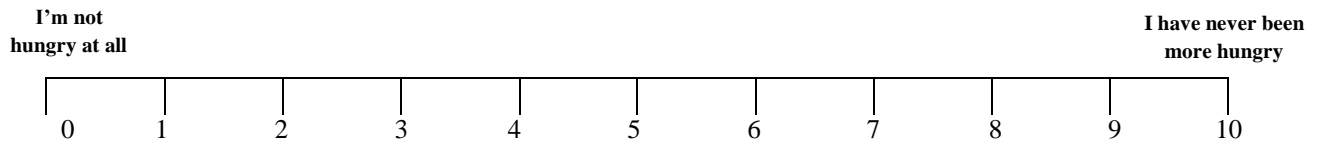

**2. How full do you feel?**

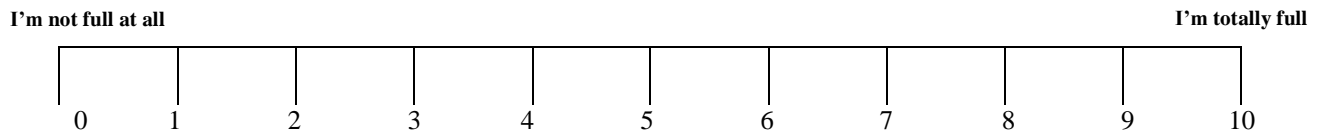

**3. How strong is your desire to eat?**

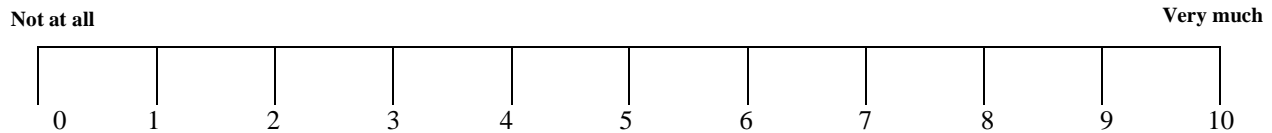

**4. How strong is your desire to eat something sweet?**

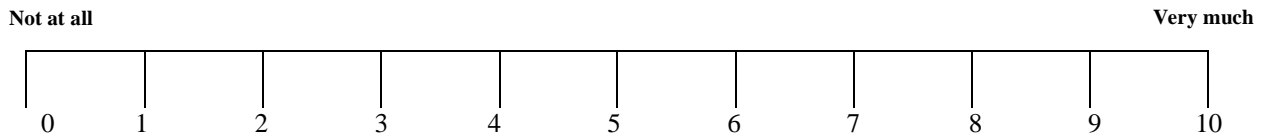

**5. How strong is your desire to eat something salty?**

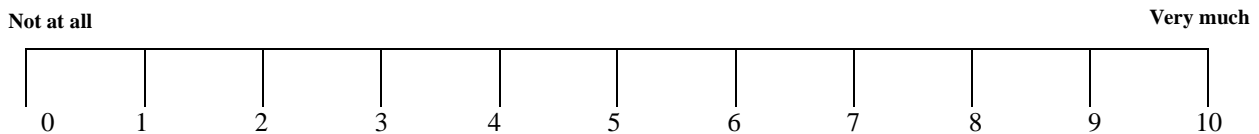

**6. How strong is your desire to eat something fat?**

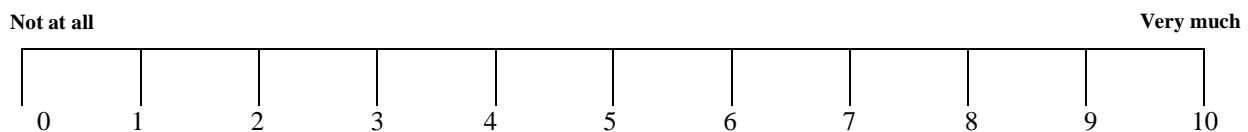

Supplement: pone.0219193.s012.pdf [file pone.0219193.s012.pdf]
